# Supplementary material
Source: PubMed Central journal article supplement (PMC5494524)
Supplement: EMBR-18-1077-s001.pdf [file EMBR-18-1077-s001.pdf]

## Expanded View Figures

### Figure EV1. Validation of F<sub>1</sub>F<sub>0</sub> ATP synthase dimerization status.

- A High-resolution image of F<sub>1</sub>F<sub>0</sub> ATP synthase dimers and monomers isolated from rat heart mitochondria (HM) by the use of *n*-dodecyl β-D-maltoside (DM) or digitonin (DIG), upon separation by blue-native PAGE and immunostaining for ATP5A.
- B Schematic representation of PLA assay setting in physiological conditions (left) or in the course of MPT (right).
- C Immunoreactivity of the ATP5H-specific antibody used in the PLA assay as compared to an antibody specific for the mitochondrial marker TOMM20.
- D Maximum intensity projection of z-stack from a representative HEK293T cell stained for the (immuno)fluorescence microscopy-based detection of DNA (DAPI, blue), mitochondria (TOMM20, red), and F<sub>1</sub>F<sub>0</sub> ATP synthase dimers (PLA, green). Quantification of the PLA signal colocalizing with TOMM20 is reported (whiskers: max and min; box: 10<sup>th</sup> and 90<sup>th</sup> percentile; line: median).
- E Assessment of transfection efficiency in HEK293T cells transfected with a control siRNA (siCTR) or a siRNA targeting ATP5H (siATP5H) for 96 h. GAPDH levels were monitored to ensure equal lane loading.
- F, G Representative images (F) and quantification (G) of PLA assays for F<sub>1</sub>F<sub>0</sub> ATP synthase dimers in HEK293T cells transfected with siCTR or siATP5H for 96 h. The results are representative of three independent experiments. \**P* = 0.0001 (unpaired Student's *t*-test).
- H, I Representative images (H) and quantification (I) of PLA assays for F<sub>1</sub>F<sub>0</sub> ATP synthase dimers in ρ<sup>0</sup> cells and their wt counterpart HPA11. The results are representative of three independent experiments. \*\*\*\**P* = 0.0001 (unpaired Student's *t*-test).

Data information: All results are expressed as mean ± SEM. Scale bar = 10 μm.

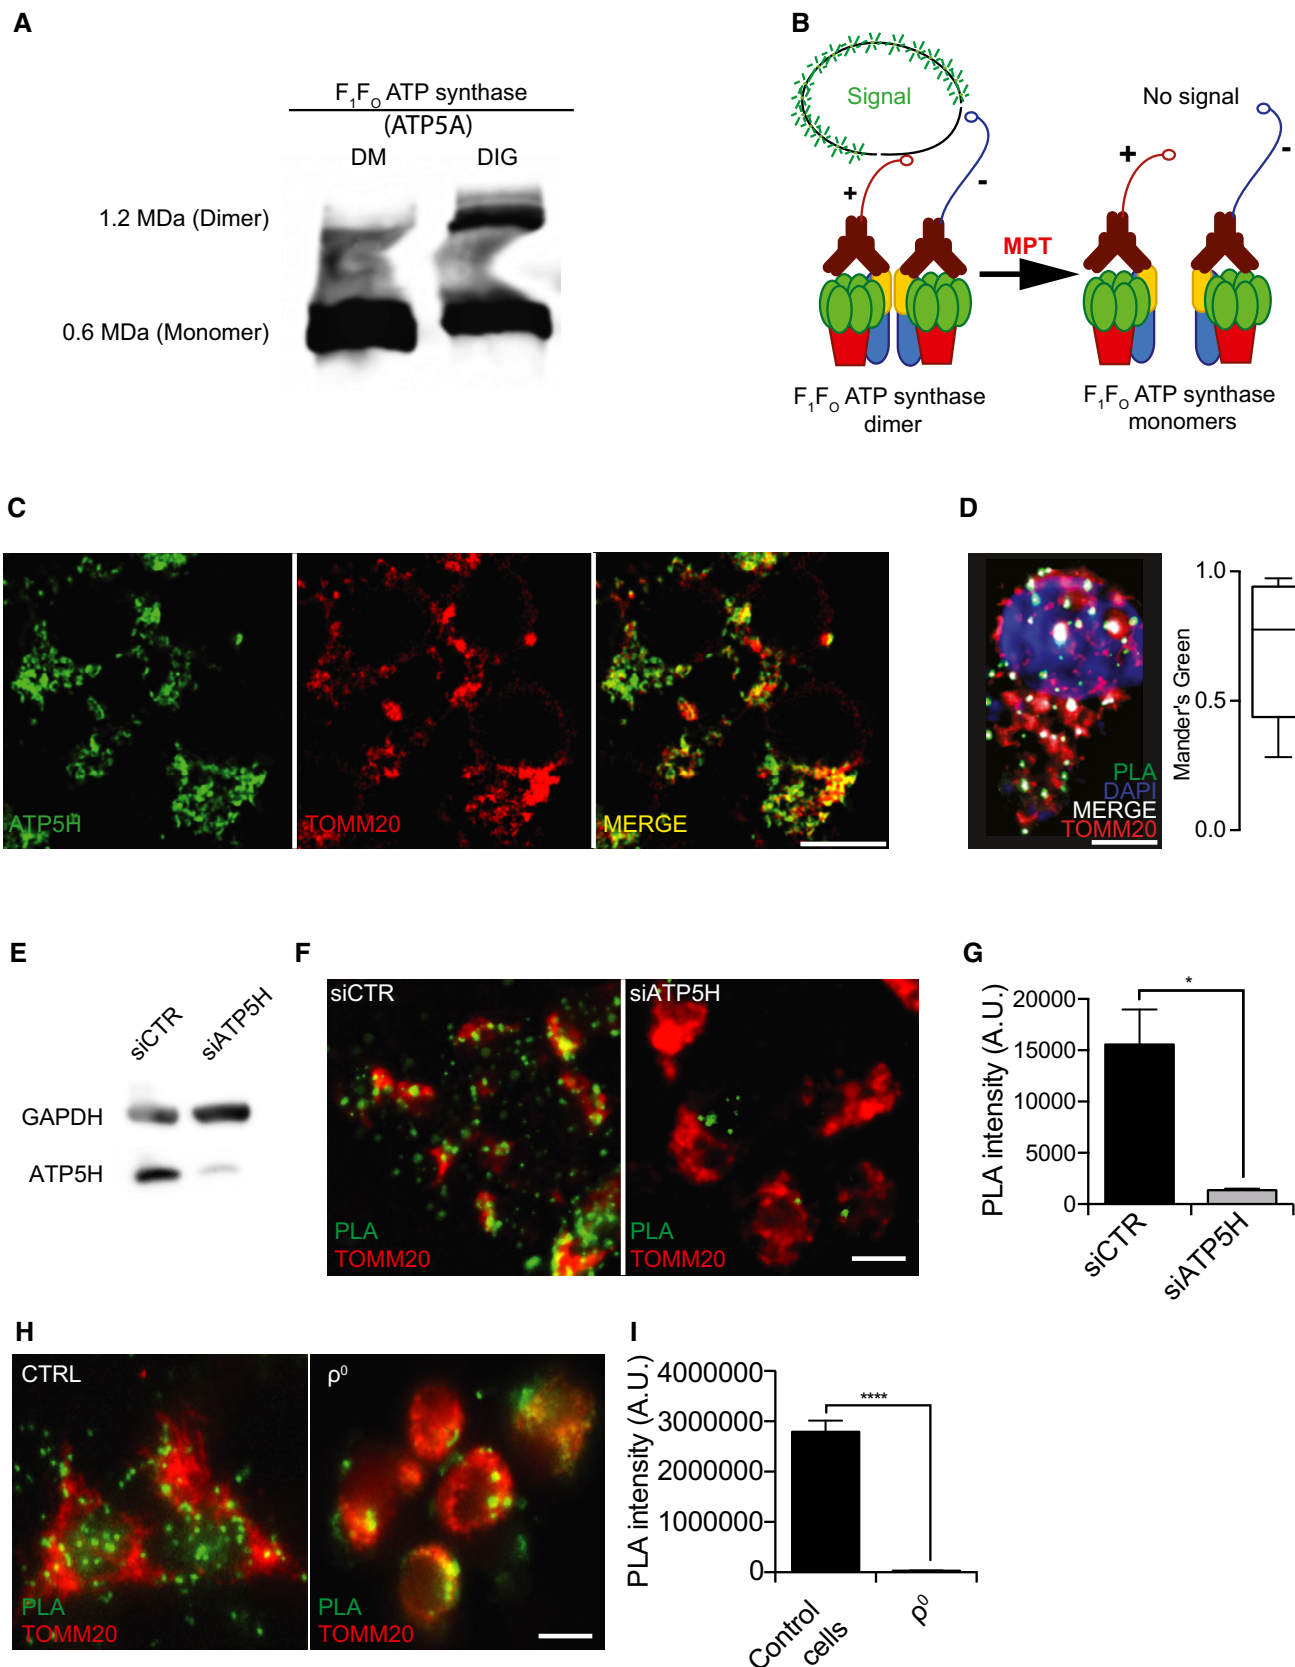

Figure EV1.

**Figure EV2. Mitochondrial parameters in ATPIF1-overexpressing HEK293T cells.**

- A–D Representative rendering (A) and quantification of morphological parameters (count, B; average volume, C; total volume, D) in HEK293T cells transiently transfected with pcDNA3 or with a plasmid for the overexpression of ATPIF1. The results are representative of three independent experiments. Scale bar = 10  $\mu$ m.
- E, F Representative images (E) and quantification (F) of TMRM staining in HEK293T cells transiently transfected with pcDNA3 or with a plasmid for the overexpression of ATPIF1. The results are representative of five independent experiments. \* $P$  = 0.0001 (unpaired Student's  $t$ -test). Scale bar = 10  $\mu$ m.
- G, H Representative traces (G) and quantification (H) of mitochondrial ATP-dependent light emission in HEK293T cells transiently transfected with pcDNA3 or with a plasmid for the overexpression of ATPIF1. 75  $\mu$ M *N,N*-dicyclohexylcarbodiimide (DCCD) was employed to completely inhibit mitochondrial ATP synthesis. The results are representative of five independent experiments.
- I, J Representative traces (I) and quantification (J) of mtAlphi/ECFP ratio in HEK293T cells transiently co-transfected with pcDNA3 or with a plasmid for the overexpression of ATPIF1. 30 mM Na acetate or 30 mM NH<sub>4</sub>Cl was employed to detect the minimum and maximum ratio, respectively. The results are representative of four independent experiments.
- K, L Representative immunoblotting for the detection of the ATP5A1 subunit after blue-native PAGE (K) and quantification (L) of F<sub>1</sub>F<sub>0</sub> ATP synthase dimers (D) and monomers (M) in HEK293T cells transiently transfected with pcDNA3 or with a plasmid for the overexpression of ATPIF1. The results are representative of three independent experiments. \* $P$  = 0.0095 (unpaired Student's  $t$ -test).

Data information: All results are expressed as mean  $\pm$  SEM.

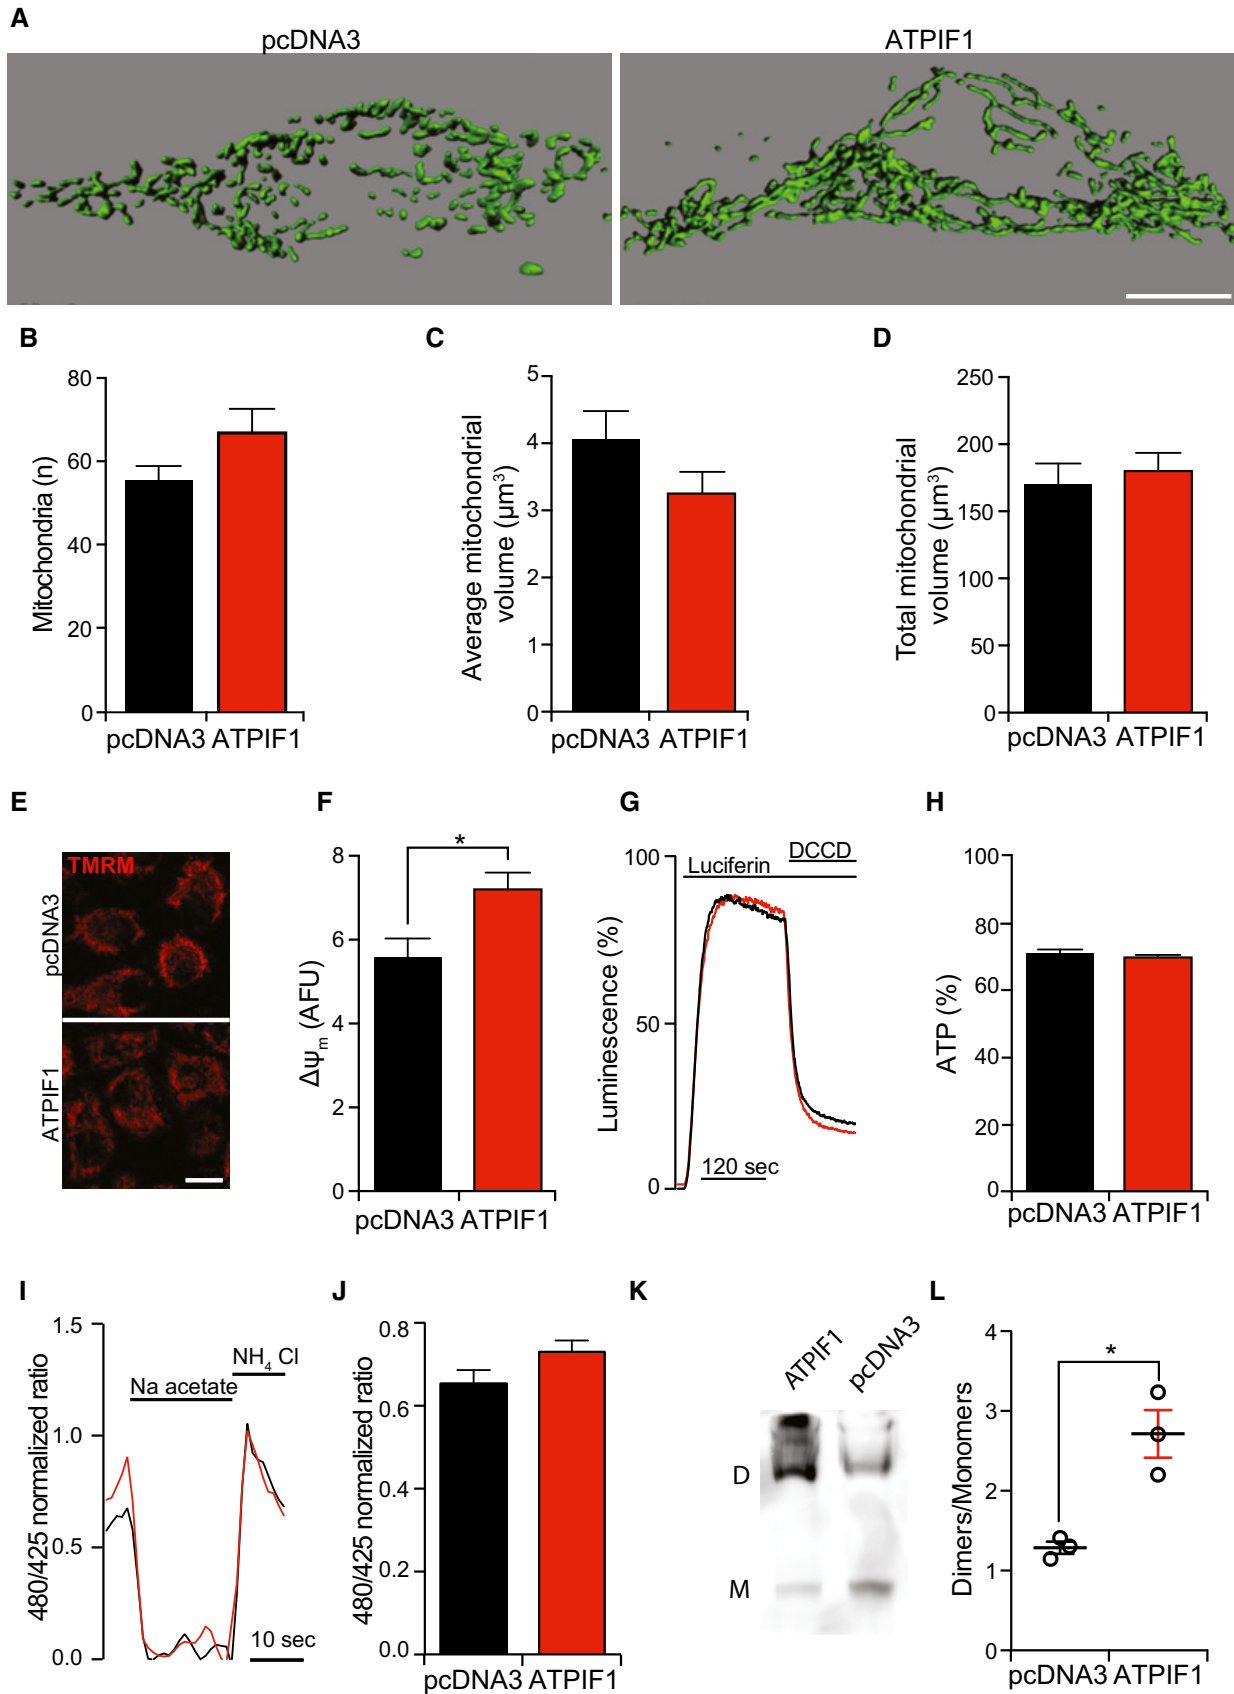

Figure EV2.

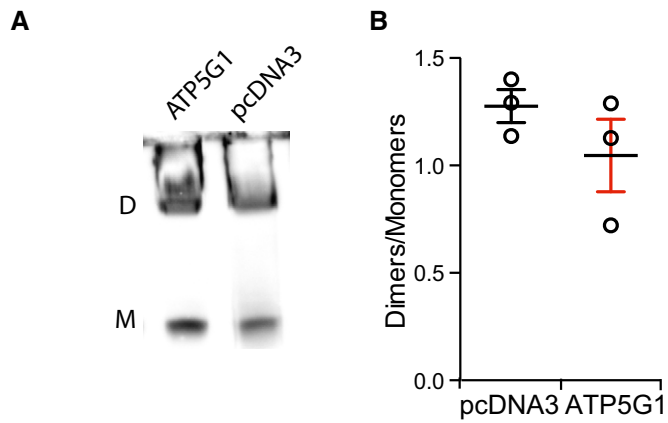

**Figure EV3. Dimerization status during ATP5I overexpression.**

A, B Representative immunoblotting for the detection of the ATP5A1 subunit after blue-native PAGE (A) and quantification (B) of F<sub>1</sub>F<sub>0</sub> ATP synthase dimers (D) and monomers (M) in HEK293T cells transiently transfected with pcDNA3 or with a plasmid for the overexpression of ATP5G1. The results are representative of three independent experiments and expressed as mean ± SEM.

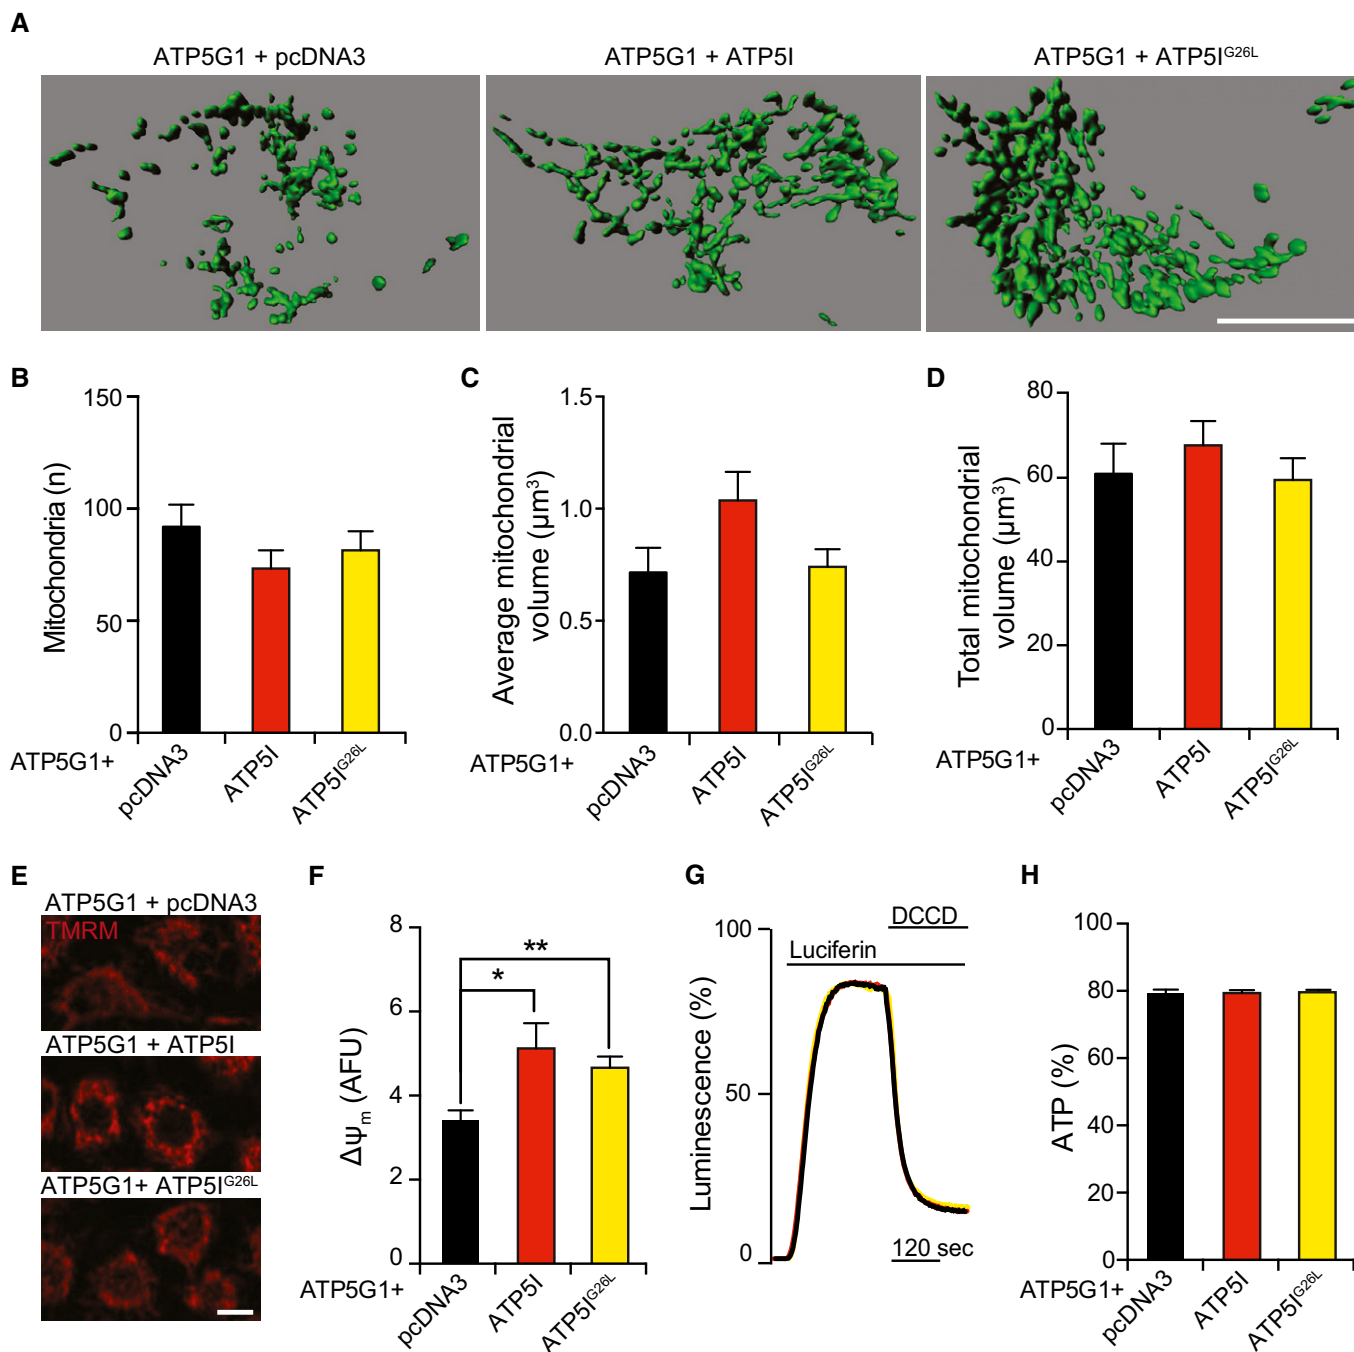

**Figure EV4. Mitochondrial parameters in ATP5G1- and ATP5I-co-overexpressing HEK293T cells.**

A–D Representative rendering (A) and quantification of morphological parameters (count, B; average volume, C; total volume, D) in HEK293T cells transiently transfected with a construct for the overexpression of ATP5G1 plus pcDNA3 or a plasmid for the overexpression of ATP5I or ATP5I<sup>G26L</sup>. The results are representative of three independent experiments. Scale bar = 10 μm.

E, F Representative images (E) and quantification (F) of TMRM staining in HEK293T cells transiently transfected with a construct for the overexpression of ATP5G1 plus pcDNA3 or a plasmid for the overexpression of ATP5I or ATP5I<sup>G26L</sup>. The results are representative of three independent experiments. \**P* = 0.0060, \*\**P* = 0.0345 (Kruskal–Wallis test with Dunn's correction for multiple comparison). Scale bar = 10 μm.

G, H Representative traces (G) and quantification (H) of mitochondrial ATP-dependent light emission in HEK293T cells transiently transfected with a construct for the overexpression of ATP5G1 plus pcDNA3 or a plasmid for the overexpression of ATP5I or ATP5I<sup>G26L</sup>. 75 μM DCCD was employed to completely inhibit mitochondrial ATP synthesis at the end of the assay. The results are representative of three independent experiments.

Data information: All results are expressed as mean ± SEM.
